# Supplementary material for: Cost-Effectiveness of Newer Antidiabetic Drugs as Second-Line Treatment for Type 2 Diabetes: A Systematic Review
Source: PubMed Central journal article supplement — Adv Ther. 2023 Jul 29;40(10):4216–35. doi: 10.1007/s12325-023-02612-z (PMC10499965; doi:10.1007/s12325-023-02612-z), 2023-07-29
Supplement: 12325_2023_2612_MOESM1_ESM.pdf [file 12325_2023_2612_MOESM1_ESM.pdf]

# **Cost-effectiveness of newer antidiabetic drugs as second-line treatment for type 2 diabetes: A systematic review**

Jiejun Zhu <sup>1</sup>, Ying Zhou <sup>1</sup>, Qingyu Li <sup>1</sup>, Gang Wang <sup>1\*</sup>

<sup>1</sup> *Department of Clinical Pharmacy, Affiliated Hangzhou First People's Hospital, Zhejiang University School of Medicine, Hangzhou, Zhejiang, China*

**\*Corresponding author:** Wang Gang, BS

Department of Clinical Pharmacy

Affiliated Hangzhou First People's Hospital, Zhejiang University School of Medicine

No. 261 Huansha Road, Hangzhou, Zhejiang, 310006, China

E-mail: 88485534@163.com

## **ORCID iDs:**

Jiejun Zhu, <https://orcid.org/0000-0002-8836-5711>

Gang Wang, <https://orcid.org/0009-0000-0228-1326>

**Number of supplementary tables: 5**

*Supplementary Material*

***Supplementary Table S1. Search strategy..... 3***  
***Supplementary Table S2. Inclusion and exclusion criteria..... 4***  
***Supplementary Table S3. Quality assessment score using CHEERS 2022 checklist .. 5***  
***Supplementary Table S4. Sensitivity analyses of newer antidiabetic drugs  
combined with metformin as second-line treatment..... 7***  
***Supplementary Table S5. Modelled treatment pathways..... 10***

**Supplementary Table S1. Search strategy.**

|                                          | <b>Search strategy</b>                                                                                                                                                                      | <b>Number of hits</b> |
|------------------------------------------|---------------------------------------------------------------------------------------------------------------------------------------------------------------------------------------------|-----------------------|
| <b><i>Pubmed</i></b>                     |                                                                                                                                                                                             |                       |
| #1                                       | (Type 2 Diabetes[Title/Abstract]) OR ("Diabetes Mellitus, Type 2"[Mesh])                                                                                                                    | 225,143               |
| #2                                       | second line                                                                                                                                                                                 | 101,134               |
| #3                                       | ((Cost-Benefit [Title/Abstract]) OR ("Cost-Benefit Analysis"[Mesh])) OR ((Cost-Effectiveness [Title/Abstract]) OR ("Cost-Effectiveness Analysis"[Mesh])) OR (Cost Utility [Title/Abstract]) | 136,235               |
|                                          | #1 AND #2 AND #3                                                                                                                                                                            | 55                    |
| <b><i>Web of Science</i></b>             |                                                                                                                                                                                             |                       |
| #1                                       | TS=(type 2 diabetes)                                                                                                                                                                        | 249,160               |
| #2                                       | ALL=(second line)                                                                                                                                                                           | 154,330               |
| #3                                       | ((TS=(Cost-Benefit)) OR TS=(Cost-Effectiveness)) OR TS=(Cost Utility)                                                                                                                       | 194,930               |
|                                          | #1 AND #2 AND #3                                                                                                                                                                            | 45                    |
| <b><i>Embase</i></b>                     |                                                                                                                                                                                             |                       |
| #1                                       | 'type 2 diabetes':ti,ab,kw                                                                                                                                                                  | 249,687               |
| #2                                       | 'second line' OR (second AND ('line'/exp OR line))                                                                                                                                          | 156,701               |
| #3                                       | 'cost benefit':ti,ab,kw OR 'cost effectiveness':ti,ab,kw OR 'cost utility':ti,ab,kw                                                                                                         | 125,802               |
|                                          | #1 AND #2 AND #3                                                                                                                                                                            | 74                    |
| <b><i>International HTA Database</i></b> |                                                                                                                                                                                             |                       |
|                                          | ((Diabetes Mellitus, Type 2)[mh] OR (type 2 diabetes)) AND (second line)                                                                                                                    | 12                    |
| <b><i>NIHR HTA journal</i></b>           |                                                                                                                                                                                             |                       |
|                                          | "type 2 diabetes" and "second line"                                                                                                                                                         | 22                    |

Search date: April 26, 2023

**Supplementary Table S2. Inclusion and exclusion criteria.**

|                   | <b>Inclusion criteria</b>                                                                                           | <b>Exclusion criteria</b>                                                                                               |
|-------------------|---------------------------------------------------------------------------------------------------------------------|-------------------------------------------------------------------------------------------------------------------------|
| Language          | English                                                                                                             |                                                                                                                         |
| Publication type  | original research                                                                                                   | editorials, protocol, commentary, reviews, systematic reviews, letters, case study/case series, etc                     |
| Publication dates | no limits                                                                                                           |                                                                                                                         |
| Participants      | adults with type 2 diabetes                                                                                         | type 1 diabetes                                                                                                         |
| Intervention      | second-line therapy                                                                                                 | first-line was not metformin                                                                                            |
| Outcomes          | costs, life years, quality adjusted life years, incremental cost-effective ratios, incremental net monetary benefit |                                                                                                                         |
| Study design      | full economic evaluations (CEA and CUA)                                                                             | exclude partial economic evaluations (e.g., only describe burden of illness, cost of illness, cost outcome description) |

*CEA*: cost-effectiveness analysis, *CUA*: cost-utility analysis

Supplementary Table S3. Quality assessment score using CHEERS 2022 checklist

| Items                                                | (Ehlers et al., 2022) | (Reifsnider et al., 2022) | (Ehlers et al., 2021) | (Reifsnider et al., 2021) | (Bagepally et al., 2021) | (Ramos et al., 2020) | (Chien et al., 2020) | (Gu et al., 2020) | (Kousoulakou et al., 2017) | (Gordon et al., 2017) | (CADTH, 2017) | (Gu et al., 2016) | (Gordon et al., 2016) | (Tzanetakos et al., 2016) | (Gu et al., 2020) | (Charokopou et al., 2015b) | (Charokopou et al., 2015a) | (Viriato et al., 2014) | (Steen Carlsson and Persson, 2014) | (Kiadaliri et al., 2014) | (Elgart et al., 2013) | (Grzeszczak et al., 2012) | (Granström et al., 2012) | (Erhardt et al., 2012) | (Davies et al., 2012) | (Klarenbach et al., 2011) | (Sinha et al., 2010) | (Schwarz et al., 2008) |   |
|------------------------------------------------------|-----------------------|---------------------------|-----------------------|---------------------------|--------------------------|----------------------|----------------------|-------------------|----------------------------|-----------------------|---------------|-------------------|-----------------------|---------------------------|-------------------|----------------------------|----------------------------|------------------------|------------------------------------|--------------------------|-----------------------|---------------------------|--------------------------|------------------------|-----------------------|---------------------------|----------------------|------------------------|---|
| 1. Title                                             | 1                     | 1                         | 1                     | 1                         | 1                        | 1                    | 0.5                  | 0.5               | 1                          | 0.5                   | 1             | 1                 | 0.5                   | 1                         | 1                 | 1                          | 1                          | 1                      | 1                                  | 1                        | 0.5                   | 1                         | 0.5                      | 1                      | 0.5                   | 0.5                       | 0                    | 1                      |   |
| 2. Abstract                                          | 1                     | 1                         | 0.5                   | 1                         | 0.5                      | 0.5                  | 0.5                  | 0.5               | 1                          | 0                     | 0.5           | 0.5               | 0.5                   | 0.5                       | 0.5               | 0.5                        | 0.5                        | 0.5                    | 0.5                                | 0.5                      | 1                     | 0.5                       | 0.5                      | 1                      | 0.5                   | 0.5                       | 1                    | 0.5                    |   |
| 3. Background and objectives                         | 1                     | 1                         | 1                     | 1                         | 1                        | 1                    | 1                    | 1                 | 1                          | 1                     | 1             | 1                 | 1                     | 1                         | 1                 | 1                          | 1                          | 1                      | 1                                  | 1                        | 1                     | 1                         | 1                        | 1                      | 1                     | 1                         | 1                    | 1                      |   |
| 4. Health economic analysis plan                     | 0                     | 0                         | 0                     | 0                         | 0                        | 0                    | 0                    | 0                 | 0                          | 1                     | 1             | 0                 | 0                     | 0                         | 0                 | 0                          | 0                          | 0                      | 0                                  | 0                        | 0                     | 0                         | 0                        | 0                      | 0                     | 0                         | 0                    | 0                      |   |
| 5. Study population                                  | 1                     | 1                         | 1                     | 1                         | 0.5                      | 1                    | 1                    | 1                 | 0.5                        | 1                     | 1             | 1                 | 1                     | 1                         | 1                 | 1                          | 1                          | 1                      | 1                                  | 1                        | 1                     | 1                         | 1                        | 1                      | 1                     | 0.5                       | 0.5                  | 1                      |   |
| 6. Setting and location                              | 0.5                   | 0.5                       | 0.5                   | 0.5                       | 0.5                      | 0.5                  | 0.5                  | 0.5               | 1                          | 1                     | 1             | 1                 | 0.5                   | 0.5                       | 1                 | 1                          | 1                          | 1                      | 1                                  | 1                        | 0.5                   | 0.5                       | 0.5                      | 0                      | 0.5                   | 0.5                       | 1                    | 0.5                    | 1 |
| 7. Comparators                                       | 1                     | 1                         | 1                     | 1                         | 1                        | 1                    | 1                    | 1                 | 1                          | 1                     | 1             | 1                 | 1                     | 1                         | 1                 | 1                          | 1                          | 1                      | 1                                  | 1                        | 0.5                   | 1                         | 1                        | 1                      | 1                     | 1                         | 1                    | 1                      |   |
| 8. Perspective                                       | 0.5                   | 1                         | 1                     | 1                         | 1                        | 1                    | 1                    | 1                 | 1                          | 1                     | 1             | 0.5               | 0                     | 1                         | 1                 | 1                          | 1                          | 1                      | 1                                  | 1                        | 1                     | 1                         | 0                        | 1                      | 1                     | 1                         | 1                    | 0                      |   |
| 9. Time horizon                                      | 1                     | 1                         | 1                     | 1                         | 1                        | 1                    | 1                    | 1                 | 1                          | 1                     | 1             | 1                 | 1                     | 1                         | 1                 | 1                          | 1                          | 1                      | 1                                  | 0.5                      | 0.5                   | 1                         | 0.5                      | 1                      | 0.5                   | 1                         | 1                    | 0.5                    |   |
| 10. Discount rate                                    | 1                     | 1                         | 1                     | 1                         | 1                        | 1                    | 1                    | 1                 | 0.5                        | 1                     | 0             | 1                 | 0.5                   | 1                         | 1                 | 1                          | 1                          | 1                      | 1                                  | 0.5                      | 0.5                   | 1                         | 0.5                      | 1                      | 0.5                   | 1                         | 0.5                  | 1                      |   |
| 11. Selection of outcomes                            | 1                     | 1                         | 1                     | 1                         | 1                        | 1                    | 1                    | 1                 | 1                          | 1                     | 1             | 1                 | 0.5                   | 1                         | 1                 | 1                          | 1                          | 1                      | 1                                  | 0.5                      | 1                     | 1                         | 1                        | 1                      | 1                     | 0.5                       | 1                    | 1                      |   |
| 12. Measurement of outcomes                          | 1                     | 1                         | 1                     | 1                         | 1                        | 1                    | 1                    | 1                 | 1                          | 1                     | 1             | 1                 | 1                     | 1                         | 1                 | 1                          | 1                          | 1                      | 1                                  | 1                        | 1                     | 1                         | 1                        | 1                      | 1                     | 1                         | 1                    | 1                      |   |
| 13. Valuation of outcomes                            | 1                     | 1                         | 1                     | 1                         | 1                        | 1                    | 1                    | 1                 | 1                          | 1                     | 1             | 1                 | 1                     | 1                         | 1                 | 1                          | 1                          | 1                      | 1                                  | 1                        | 1                     | 1                         | 1                        | 1                      | 1                     | 1                         | 1                    | 1                      |   |
| 14. Measurement and valuation of resources and costs | 1                     | 1                         | 1                     | 1                         | 0.5                      | 1                    | 1                    | 1                 | 1                          | 0.5                   | 1             | 1                 | 1                     | 1                         | 1                 | 1                          | 1                          | 1                      | 1                                  | 1                        | 1                     | 0.5                       | 1                        | 1                      | 1                     | 1                         | 1                    | 1                      |   |
| 15. Currency, price date, and conversion             | 1                     | 1                         | 1                     | 1                         | 1                        | 0                    | 1                    | 1                 | 1                          | 1                     | 1             | 1                 | 1                     | 1                         | 1                 | 1                          | 1                          | 1                      | 1                                  | 1                        | 1                     | 1                         | 1                        | 1                      | 1                     | 1                         | 1                    | 1                      |   |
| 16. Rationale and description of model               | 1                     | 0.5                       | 1                     | 1                         | 1                        | 1                    | 1                    | 1                 | 1                          | 1                     | 1             | 1                 | 1                     | 1                         | 1                 | 1                          | 1                          | 1                      | 1                                  | 1                        | 1                     | 1                         | 1                        | 1                      | 1                     | 1                         | 1                    | 0.5                    | 1 |
| 17. Analytics and assumptions                        | 1                     | 1                         | 1                     | 1                         | 1                        | 1                    | 1                    | 1                 | 1                          | 1                     | 1             | 1                 | 1                     | 1                         | 1                 | 1                          | 1                          | 1                      | 1                                  | 1                        | 1                     | 0.5                       | 1                        | 1                      | 1                     | 0.5                       | 1                    | 1                      |   |
| 18. Characterizing heterogeneity                     | 0                     | 0                         | 0                     | 1                         | 0                        | 1                    | 0                    | 0                 | 0                          | 1                     | 1             | 0                 | 1                     | 0                         | 0                 | 0                          | 0                          | 0                      | 1                                  | 0                        | 0                     | 0                         | 0                        | 0                      | 1                     | 0                         | 0                    | 1                      |   |
| 19. Characterizing distributional effects            | 1                     | 1                         | 0                     | 1                         | 0                        | 0                    | 0                    | 0                 | 0                          | 0                     | 1             | 0.5               | 1                     | 0                         | 0                 | 0                          | 0                          | 0                      | 1                                  | 0                        | 0                     | 0                         | 0                        | 0                      | 1                     | 0                         | 0                    | 0                      |   |

|                                                                           |             |             |             |           |             |             |             |           |           |             |             |           |           |             |             |             |             |           |           |           |           |             |             |           |           |             |             |           |
|---------------------------------------------------------------------------|-------------|-------------|-------------|-----------|-------------|-------------|-------------|-----------|-----------|-------------|-------------|-----------|-----------|-------------|-------------|-------------|-------------|-----------|-----------|-----------|-----------|-------------|-------------|-----------|-----------|-------------|-------------|-----------|
| 20. Characterizing uncertainty                                            | 1           | 1           | 1           | 1         | 1           | 1           | 1           | 1         | 1         | 1           | 1           | 1         | 1         | 1           | 1           | 1           | 1           | 1         | 1         | 1         | 1         | 1           | 1           | 1         | 1         | 0           | 1           |           |
| 21. Approach to engagement with patients and others affected by the study | 0           | 0           | 0           | 0         | 0           | 0           | 0           | 0         | 0         | 0           | 0           | 0         | 0         | 0           | 0           | 0           | 0           | 0         | 0         | 0         | 0         | 0           | 0           | 0         | 0         | 0           | 0           |           |
| 22. Study parameters                                                      | 1           | 1           | 1           | 1         | 1           | 1           | 1           | 1         | 1         | 1           | 1           | 1         | 1         | 1           | 1           | 1           | 1           | 1         | 0.5       | 0.5       | 0.5       | 1           | 1           | 0.5       | 0.5       | 1           | 1           |           |
| 23. Summary of main results                                               | 1           | 1           | 1           | 1         | 1           | 1           | 1           | 1         | 1         | 1           | 1           | 1         | 1         | 1           | 1           | 1           | 1           | 1         | 1         | 1         | 1         | 1           | 1           | 1         | 1         | 1           | 1           |           |
| 24. Effect of uncertainty                                                 | 1           | 1           | 0.5         | 1         | 0.5         | 1           | 1           | 1         | 0.5       | 0.5         | 1           | 1         | 1         | 1           | 0.5         | 0.5         | 0.5         | 1         | 0.5       | 0.5       | 0.5       | 1           | 1           | 0.5       | 0.5       | 0.5         | 1           |           |
| 25. Effect of engagement with patients and others affected by the study   | 0           | 0           | 0           | 0         | 0           | 0           | 0           | 0         | 0         | 0           | 0           | 0         | 1         | 0           | 0           | 0           | 0           | 0         | 0         | 0         | 0         | 0           | 0           | 0         | 0         | 0           | 0           |           |
| 26. Study findings, limitations, generalizability, and current knowledge  | 0.5         | 0.5         | 1           | 0.5       | 1           | 0.5         | 1           | 0.5       | 0.5       | 1           | 1           | 0.5       | 0.5       | 0.5         | 1           | 0.5         | 0.5         | 1         | 0.5       | 0.5       | 0.5       | 0.5         | 0.5         | 0.5       | 0.5       | 1           | 1           |           |
| 27. Source of funding                                                     | 1           | 1           | 1           | 1         | 1           | 1           | 1           | 1         | 1         | 1           | 1           | 1         | 1         | 1           | 1           | 1           | 1           | 1         | 1         | 1         | 1         | 0           | 1           | 1         | 1         | 1           | 0           |           |
| 28. Conflicts of interest                                                 | 1           | 1           | 1           | 1         | 1           | 1           | 1           | 1         | 1         | 1           | 0           | 0         | 1         | 1           | 1           | 1           | 1           | 1         | 1         | 1         | 1         | 1           | 1           | 1         | 1         | 1           | 0           |           |
| <b>Total</b>                                                              | <b>22.5</b> | <b>22.5</b> | <b>21.5</b> | <b>24</b> | <b>20.5</b> | <b>21.5</b> | <b>21.5</b> | <b>21</b> | <b>21</b> | <b>22.5</b> | <b>23.5</b> | <b>21</b> | <b>22</b> | <b>21.5</b> | <b>22.5</b> | <b>21.5</b> | <b>21.5</b> | <b>22</b> | <b>24</b> | <b>19</b> | <b>19</b> | <b>19.5</b> | <b>17.5</b> | <b>22</b> | <b>21</b> | <b>19.5</b> | <b>18.5</b> | <b>20</b> |

**Supplementary Table S4. Sensitivity analyses of newer antidiabetic drugs combined with metformin as second-line treatment.**

| Author, Year                                 | Deterministic sensitivity analyses                                                                                                                                                   |                                             | Probabilistic sensitivity analyses |                                   |
|----------------------------------------------|--------------------------------------------------------------------------------------------------------------------------------------------------------------------------------------|---------------------------------------------|------------------------------------|-----------------------------------|
|                                              | Key drivers                                                                                                                                                                          | Cost-effective                              | Probability                        | WTP                               |
| <b><i>GLP-1RA vs. SGLT2i</i></b>             |                                                                                                                                                                                      |                                             |                                    |                                   |
| (Ehlers et al., 2022)                        | <ul style="list-style-type: none"> <li>price of semaglutide (sc)</li> <li>duration of semaglutide therapy</li> </ul>                                                                 | Empagliflozin                               | 81%                                | DKK 357,100<br>(1×GDP per capita) |
| (Ehlers et al., 2021)                        | <ul style="list-style-type: none"> <li>treatment costs</li> </ul>                                                                                                                    | Empagliflozin                               | 78%                                | DKK 357,100<br>(1×GDP per capita) |
| (Ramos et al., 2020)                         | <ul style="list-style-type: none"> <li>treatment costs</li> </ul>                                                                                                                    | Empagliflozin                               | 95%-97%                            | GBP 20,000                        |
| (Reifsnider et al., 2022)                    | <ul style="list-style-type: none"> <li>drug costs</li> <li>disutility of injectable treatment</li> <li>treatment effect on cardiovascular disease</li> </ul>                         | Empagliflozin                               | 100%                               | USD 50,000                        |
| <b><i>GLP-1RA vs. Others<sup>a</sup></i></b> |                                                                                                                                                                                      |                                             |                                    |                                   |
| (Steen Carlsson and Persson, 2014)           | <ul style="list-style-type: none"> <li>Earlier initiation of second-line at HbA1c 7%</li> </ul>                                                                                      | Liraglutide (vs. Glimepiride)               | 74%                                | SEK 500,000                       |
| (Davies et al., 2012)                        | <ul style="list-style-type: none"> <li>improvement in HbA1c</li> <li>improvement in weight</li> <li>improvement in systolic blood pressure</li> <li>improvement in weight</li> </ul> | Liraglutide (vs. Sitagliptin)               | 89%                                | GBP 20,000                        |
|                                              |                                                                                                                                                                                      | Liraglutide 1.2mg / 1.8mg (vs. Sitagliptin) | 77% / 85%                          |                                   |
|                                              |                                                                                                                                                                                      | Liraglutide 1.2mg / 1.8mg (vs. Glimepiride) | 82% / 92%                          |                                   |
| (Sinha et al., 2010)                         | <ul style="list-style-type: none"> <li>medication costs</li> <li>side effect duration</li> <li>side effect associated disutilities</li> </ul>                                        | NA                                          | NA                                 | NA                                |
|                                              |                                                                                                                                                                                      |                                             |                                    |                                   |
|                                              |                                                                                                                                                                                      |                                             |                                    |                                   |
| (Kiadaliri et al., 2014)                     | <ul style="list-style-type: none"> <li>BMI related utility</li> <li>disutility of mild/moderate hypoglycemia</li> <li>incidence of moderate/major hypoglycemia</li> </ul>            | GLP-1RA (vs. DPP-4i)                        | 74%                                | SEK 500,000                       |
|                                              |                                                                                                                                                                                      | GLP-1RA (vs. NPH insulin)                   | 100%                               |                                   |
|                                              |                                                                                                                                                                                      | DPP-4i (vs. NPH insulin)                    | 98%                                |                                   |
| <b><i>SGLT2i vs. Others<sup>b</sup></i></b>  |                                                                                                                                                                                      |                                             |                                    |                                   |
| (Reifsnider et al., 2021)                    | <ul style="list-style-type: none"> <li>drug costs</li> </ul>                                                                                                                         | Empagliflozin                               | 100%                               | USD 50,000-150,000                |
| (Charokopou et al., 2015a)                   | <ul style="list-style-type: none"> <li>improvement in weight</li> </ul>                                                                                                              | Dapagliflozin                               | 85%                                | GBP 20,000                        |
| (Bagepally et al., 2021)                     | <ul style="list-style-type: none"> <li>cost of triple therapy</li> <li>probabilities of metformin treatment failure</li> </ul>                                                       | Dapagliflozin                               | 100%                               | INR 156,798<br>(1×GDP per capita) |
|                                              |                                                                                                                                                                                      |                                             |                                    |                                   |

|                                             |                                                                                                                                                                          |                                                      |               |                                  |
|---------------------------------------------|--------------------------------------------------------------------------------------------------------------------------------------------------------------------------|------------------------------------------------------|---------------|----------------------------------|
| (Charokopou et al., 2015b)                  | <ul style="list-style-type: none"> <li>probabilities of dual therapy failure</li> <li>improvement in weight</li> <li>BMI related utility</li> </ul>                      | Dapagliflozin                                        | 100%          | GBP 20,000                       |
| (Tzanetakos et al., 2016)                   | <ul style="list-style-type: none"> <li>BMI related utility</li> <li>improvement in HbA1c</li> </ul>                                                                      | Dapagliflozin (vs. SU)<br>Dapagliflozin (vs. DPP-4i) | 100%<br>79.7% | EUR 34,000<br>(2×GDP per capita) |
| <b><i>DPP-4i vs. Others<sup>c</sup></i></b> |                                                                                                                                                                          |                                                      |               |                                  |
| (Gu et al., 2015)                           | <ul style="list-style-type: none"> <li>BMI related utility</li> <li>HbA1c baseline</li> </ul>                                                                            | Saxagliptin                                          | 74.3%         | CNY 43,320<br>(1×GDP per capita) |
| (Elgart et al., 2013)                       | <ul style="list-style-type: none"> <li>HbA1c baseline</li> <li>age baseline</li> <li>all costs</li> </ul>                                                                | Saxagliptin                                          | 58%           | USD 7,626<br>(1×GDP per capita)  |
| (Granström et al., 2012)                    | <ul style="list-style-type: none"> <li>BMI related utility</li> <li>HbA1c threshold for third-line therapy</li> </ul>                                                    | Saxagliptin                                          | 72%           | SEK 500,000                      |
| (Erhardt et al., 2012)                      | <ul style="list-style-type: none"> <li>treatment-induced changes in weight</li> <li>age baseline</li> <li>skip first-line</li> </ul>                                     | Saxagliptin                                          | Not specified | NA                               |
| (Grzeszczak et al., 2012)                   | <ul style="list-style-type: none"> <li>skip first-line</li> <li>disutilities related to insulin</li> <li>weight gain</li> <li>HbA1c baseline</li> </ul>                  | Saxagliptin                                          | 74%           | USD 36,300<br>(1×GDP per capita) |
| (Kousoulakou et al., 2017)                  | <ul style="list-style-type: none"> <li>HbA1c threshold for therapy switch</li> </ul>                                                                                     | NA                                                   | NA            | EUR 13,522<br>(1×GDP per capita) |
| (Viriato et al., 2014)                      | <ul style="list-style-type: none"> <li>coefficient of treatment failure</li> <li>drug costs</li> <li>drug-specific reduction in HbA1c</li> <li>discount rates</li> </ul> | Vildagliptin                                         | 79%           | EUR 30,000                       |
| (Gordon et al., 2016)                       | <ul style="list-style-type: none"> <li>time horizon</li> </ul>                                                                                                           | Alogliptin 12.5 / 25 mg                              | 67.6% / 77.1% | GBP 30,000                       |
| (Schwarz et al., 2008)                      | <ul style="list-style-type: none"> <li>efficacy of sitagliptin</li> <li>effect of TZD on systolic blood pressure</li> </ul>                                              | NA                                                   | NA            | EUR 50,000-120,000<br>(Finland)  |
| (Gu et al., 2016)                           | <ul style="list-style-type: none"> <li>BMI related utility</li> <li>HbA1c baseline</li> </ul>                                                                            | Saxagliptin                                          | 74.7%         | CNY 46,629<br>(1×GDP per capita) |



|                                    |                                      |                                     |               |                        |
|------------------------------------|--------------------------------------|-------------------------------------|---------------|------------------------|
|                                    | • HbA1c threshold for therapy switch |                                     |               |                        |
| (Gordon et al., 2017)              | NA                                   | DPP-4i (vs. SU)                     | 57%           | GBP 30,000             |
|                                    |                                      | DPP-4i (vs. TZD)                    | 62%           |                        |
| <b>Multiple antidiabetic drugs</b> |                                      |                                     |               |                        |
| (CADTH, 2017)                      | • price of treatments                | SU                                  | Not specified | CAD 39,000 to 135,000  |
|                                    |                                      | SGLT2i                              | Not specified | CAD 136,000 to 180,000 |
|                                    |                                      | GLP-1RA                             | Not specified | > CAD 180,000          |
| (Klarenbach et al., 2011)          | • price of treatments                | SU                                  | 100%          | CAD 50,000             |
| (Chien et al., 2020)               | • baseline HbA1c                     | SGLT2i (DPP-4i as third-line)       | 70%           | NTD 770,770            |
|                                    | • baseline age                       | SGLT2i (SU as third-line)           | 30%           | (1×GDP per capita)     |
|                                    | • HbA1c threshold                    |                                     |               |                        |
| (Gu et al., 2020)                  | • HbA1c threshold for therapy switch | Meglitinide (Insulin as third-line) | Not specified | CNY 212,676            |
|                                    | • risk equations                     |                                     |               | (3×GDP per capita)     |

*AGI*:  $\alpha$ -glucosidase inhibitors, *BMI*: body mass index, *CADTH*: Canadian Agency for Drugs and Technologies in Health, *DPP-4i*: dipeptidyl peptidase-4 inhibitor, *GDP*: gross domestic product, *GLP-1RA*: glucagon-like peptide-1 receptor agonist, *NPH*: neutral protamine Hagedorn, *SGLT2i*: sodium-glucose cotransporter-2 inhibitor, *SU*: sulfonylurea, *TZD*: thiazolidinedione, *WTP*: willing to pay.

<sup>a</sup> GLP-1RA vs. DPP-4i, SU or Insulin.

<sup>b</sup> SGLT2i vs. DPP-4i or SU.

<sup>c</sup> DPP-4i vs. SU, TZD, AGI or Insulin.

**Supplementary Table S5. Modelled treatment pathways**

| Author (Year)                                 | Second-line                                       | Third-line                                                                          | Fourth-line                                                                    |
|-----------------------------------------------|---------------------------------------------------|-------------------------------------------------------------------------------------|--------------------------------------------------------------------------------|
| <b><i>GLP-1RA vs. SGLT2i</i></b>              |                                                   |                                                                                     |                                                                                |
| (Ehlers et al., 2022)                         | MET + Semaglutide (sc) or Empagliflozin           | (HbA1c > 7.5%) + Glargine 0.7 IU/kg                                                 | (HbA1c > 7.5%) MET + Glargine 0.9 IU/kg                                        |
| (Ehlers et al., 2021)                         | MET+ Liraglutide or Empagliflozin                 | (HbA1c > 8%) + Basal bolus                                                          |                                                                                |
| (Ramos et al., 2020)                          | MET + Semaglutide (po) or Empagliflozin           | (HbA1c > 7.5%) + Glargine 0.7 IU/kg                                                 | (HbA1c > 7.5%) Glargine 0.9 IU/kg                                              |
| (Reifsnider et al., 2022)                     | MET + Liraglutide or Empagliflozin                | (12.6 initiations per 100 person-years) + Empagliflozin or Liraglutide <sup>a</sup> | (3.1 initiations per 100 person-years) + Glargine 80 IU/d <sup>a</sup>         |
| <b><i>GLP-1RA vs. Others <sup>a</sup></i></b> |                                                   |                                                                                     |                                                                                |
| (Steen Carlsson and Persson, 2014)            | MET + Liraglutide, Glimepiride or Sitagliptin     | (HbA1c > 9%) MET + NPH 40 IU/d                                                      |                                                                                |
| (Davies et al., 2012)                         | MET + Liraglutide, Glimepiride or Sitagliptin     | (Year 6) + Glargine 40 IU/d                                                         |                                                                                |
| (Sinha et al., 2010)                          | MET + Glyburide, Exenatide (daily) or Sitagliptin | (treatment failure rate 25% per year) + Rosiglitazone                               | (treatment failure rate 40% at first year, 50% per year) + NPH insulin 10 IU/d |
| (Kiadaliri et al., 2014)                      | MET + GLP-1RA, DPP-4i, or NPH insulin 40 IU/d     | (HbA1c > 7.5%) MET + NPH insulin 40 IU/d                                            | (HbA1c > 8%) MET + NPH insulin 60 IU/d                                         |
| <b><i>SGLT2i vs. Others <sup>b</sup></i></b>  |                                                   |                                                                                     |                                                                                |
| (Reifsnider et al., 2021)                     | MET + Empagliflozin or Sitagliptin                | (12.6 initiations per 100 person-years) + Sitagliptin or Empagliflozin              | (3.1 initiations per 100 person-years) + Glargine 80 IU/d                      |
| (Charokopou et al., 2015a)                    | MET + Dapagliflozin or Sitagliptin                | (HbA1c > 8.05%) MET + Basal insulin 40 IU/d                                         | (HbA1c > 8.05%) MET + Basal insulin 60 IU/L                                    |
| (Bagepally et al., 2021)                      | MET + Dapagliflozin or SU                         | (HbA1c > 7%) + Insulin 40 IU/d                                                      |                                                                                |
| (Charokopou et al., 2015b)                    | MET + Dapagliflozin or SU                         | (HbA1c > 7.7%) MET + Basal insulin 40 IU/d                                          | (HbA1c > 7.7%) MET + Basal insulin 60 IU/L                                     |
| (Tzanetakos et al., 2016)                     | MET + Dapagliflozin, DPP-4i or SU                 | (HbA1c > 9%) MET + Basal insulin 40 IU/d                                            |                                                                                |
| <b><i>DPP-4i vs. Others <sup>c</sup></i></b>  |                                                   |                                                                                     |                                                                                |
| (Gu et al., 2015)                             | MET + Saxagliptin or Glimepiride                  |                                                                                     |                                                                                |
| (Elgart et al., 2013)                         | MET + Saxagliptin or SU                           | (HbA1c > 7.5%) MET + NPH                                                            |                                                                                |
| (Granström et al., 2012)                      | MET + Saxagliptin or Glipizide                    | (HbA1c > 7.5%) MET + NPH insulin 0.65 IU/kg/d                                       |                                                                                |
| (Erhardt et al., 2012)                        | MET + Saxagliptin or Glipizide                    | (HbA1c > 7.5%) MET + NPH insulin                                                    |                                                                                |
| (Grzeszczak et al., 2012)                     | MET + Saxagliptin or NPH insulin 25 IU/d          | (HbA1c > 7%) NPH insulin 40 IU/d                                                    |                                                                                |

|                                    |                                                                            |                                                     |                                            |
|------------------------------------|----------------------------------------------------------------------------|-----------------------------------------------------|--------------------------------------------|
| (Kousoulakou et al., 2017)         | MET + Vildagliptin or Glimepiride                                          | (HbA1c > 7%) MET + Basal insulin                    | (HbA1c > 7%) MET + Intensive insulin       |
| (Viriato et al., 2014)             | MET + Vildagliptin                                                         | (HbA1c > 7.5%) MET + Multiple-dose insulin          | (HbA1c > 7.5%) MET + Multiple-dose insulin |
|                                    | MET + SU                                                                   | (HbA1c > 7.5%) MET + Basal-bolus insulin            | (HbA1c > 7.5%) MET + Multiple-dose insulin |
| (Gordon et al., 2016)              | MET + Alogliptin or Glipizide                                              | (HbA1c > 7.5%) MET + NPH insulin 47.7 IU/d          |                                            |
| (Schwarz et al., 2008)             | MET + Sitagliptin or Rosiglitazone                                         | (HbA1c > 6.5%) MET + Basal insulin                  | (HbA1c > 6.5%) Multiple-dose insulin       |
|                                    | MET + Sitagliptin or SU                                                    | (HbA1c > 6.5%) MET + Basal insulin                  | (HbA1c > 6.5%) Multiple-dose insulin       |
|                                    | MET + Sitagliptin or SU                                                    | (HbA1c > 6.5%) MET + Basal insulin or Rosiglitazone | (HbA1c > 6.5%) Multiple-dose insulin       |
| (Gu et al., 2016)                  | MET + Saxagliptin or Acarbose                                              | (HbA1c > 7%) MET + Insulin                          |                                            |
| (Gordon et al., 2017)              | MET + DPP-4i, SU or TZD                                                    | (HbA1c > 7.5%) MET + NPH insulin                    |                                            |
| <b>Multiple antidiabetic drugs</b> |                                                                            |                                                     |                                            |
| (CADTH, 2017)                      | MET + SU, SGLT2i, GLP-1RA, DPP-4i, Basal insulin or Biphasic insulin       |                                                     |                                            |
| (Klarenbach et al., 2011)          | MET + SU, Meglitinide, AGI, TZD, DPP-4i, Basal insulin or Biphasic insulin |                                                     |                                            |
| (Chien et al., 2020)               | MET + SGLT2i                                                               | (HbA1c > 8%) + SU or DPP-4i                         | (HbA1c > 8%) MET + Insulin 0.3 IU/kg/d     |
|                                    | MET + DPP-4i                                                               | (HbA1c > 8%) + SU or SGLT2i                         | (HbA1c > 8%) MET + Insulin 0.3 IU/kg/d     |
|                                    | MET + GLP-1RA                                                              | (HbA1c > 8%) + SU                                   | (HbA1c > 8%) MET + Insulin 0.3 IU/kg/d     |
|                                    | MET + SU                                                                   | (HbA1c > 8%) + SU or DPP-4i                         | (HbA1c > 8%) MET + Insulin 0.3 IU/kg/d     |
|                                    | MET + Insulin 0.2 IU/kg/d                                                  | (HbA1c > 8%) + SU                                   | (HbA1c > 8%) MET + Insulin 0.3 IU/kg/d     |
| (Gu et al., 2020)                  | MET + SU, TZD, AGI, Meglitinide, DPP-4i                                    | (HbA1c > 9%) MET + Insulin or GLP-1RA               |                                            |

*AGI*:  $\alpha$ -glucosidase inhibitors, *DPP-4i*: dipeptidyl peptidase-4 inhibitor, *CADTH*: Canadian Agency for Drugs and Technologies in Health, *eGFR*: estimated glomerular filtration rate, *GLP-1RA*: glucagon-like peptide-1 receptor agonist, *MET*: metformin, *NPH*: neutral protamine Hagedorn, *SGLT2i*: sodium-glucose cotransporter-2 inhibitor, *SU*: sulfonylurea, *TZD*: thiazolidinedione.

<sup>a</sup> GLP-1RA vs. DPP-4i, SU or Insulin.

<sup>b</sup> SGLT2i vs. DPP-4i or SU.

<sup>c</sup> DPP-4i vs. SU, TZD, AGI or Insulin.
